# Supplementary material
Source: MDPI journal article supplement (https://www.mdpi.com/2076-3417/11/3/1244)
Supplement: s1 [file s1]

# SwissTargetPrediction report:

## Reference:

Gfeller D., Michielin O. & Zoete V.  
Shaping the interaction landscape of  
bioactive molecules, *Bioinformatics*  
(2013) 29:3073-3079.

## Query Molecule

## Frequency of Target Class

| Target                                                   | Uniprot ID | Gene code | ChEMBL ID     | Probability            | # sim. cmpds (3D / 2D) | Target Class            |
|----------------------------------------------------------|------------|-----------|---------------|------------------------|------------------------|-------------------------|
| Fatty acid-binding protein, heart                        | P05413     | FABP3     | CHEMBL3344    | <div><div></div></div> | 8 / 3                  | Cytosolic other         |
| Fatty acid-binding protein, intestinal                   | P12104     | FABP2     | CHEMBL4879    | <div><div></div></div> | 1 / 1                  | Cytosolic other         |
| Fatty acid-binding protein, adipocyte                    | P15090     | FABP4     | CHEMBL2083    | <div><div></div></div> | 8 / 3                  | Cytosolic other         |
| Fatty acid-binding protein, epidermal                    | Q01469     | FABP5     | CHEMBL3674    | <div><div></div></div> | 8 / 3                  | Cytosolic other         |
| Fatty acid-binding protein 12 ( <i>by homology</i> )     | A6NFH5     | FABP12    |               | <div><div></div></div> | 8 / 3                  | Cytosolic other         |
| Fatty acid-binding protein, brain ( <i>by homology</i> ) | O15540     | FABP7     |               | <div><div></div></div> | 8 / 3                  | Cytosolic other         |
| Myelin P2 protein ( <i>by homology</i> )                 | P02689     | PMP2      |               | <div><div></div></div> | 8 / 3                  | Cytosolic other         |
| Fatty acid-binding protein 9 ( <i>by homology</i> )      | Q0Z7S8     | FABP9     |               | <div><div></div></div> | 8 / 3                  | Cytosolic other         |
| Tyrosyl-DNA phosphodiesterase 1                          | Q9NUW8     | TDP1      | CHEMBL1075138 | <div><div></div></div> | 6 / 13                 | Enzyme                  |
| M-phase inducer phosphatase 1                            | P30304     | CDC25A    | CHEMBL3775    | <div><div></div></div> | 12 / 16                | Ser_Thr_Tyr Phosphatase |
| M-phase inducer phosphatase 2 ( <i>by homology</i> )     | P30305     | CDC25B    | CHEMBL4804    | <div><div></div></div> | 12 / 16                | Ser_Thr_Tyr Phosphatase |
| Microtubule-associated protein tau                       | P10636     | MAPT      | CHEMBL1293224 | <div><div></div></div> | 8 / 8                  | Unclassified            |
| Muscleblind-like protein 1                               | Q9NR56     | MBNL1     | CHEMBL1293317 | <div><div></div></div> | 4 / 1                  | Unclassified            |
| Muscleblind-like protein 2 ( <i>by homology</i> )        | Q5VZF2     | MBNL2     |               | <div><div></div></div> | 4 / 1                  | Unclassified            |
| Muscleblind-like protein 3 ( <i>by homology</i> )        | Q9NUK0     | MBNL3     |               | <div><div></div></div> | 4 / 1                  | Unclassified            |
