# Supplementary material
Source: MDPI journal article supplement (https://www.mdpi.com/2076-3417/11/3/1244)
Supplement: s1 [file s1]

# SwissTargetPrediction report:

## Reference:

Gfeller D., Michielin O. & Zoete V.  
Shaping the interaction landscape of  
bioactive molecules, *Bioinformatics*  
(2013) 29:3073-3079.

## Query Molecule

## Frequency of Target Class

| Target                                            | Uniprot ID | Gene code | ChEMBL ID     | Probability            | # sim. cmpds (3D / 2D) | Target Class            |
|---------------------------------------------------|------------|-----------|---------------|------------------------|------------------------|-------------------------|
| M-phase inducer phosphatase 1                     | P30304     | CDC25A    | CHEMBL3775    | <div><div></div></div> | 6 / 1                  | Ser_Thr_Tyr Phosphatase |
| M-phase inducer phosphatase 2                     | P30305     | CDC25B    | CHEMBL4804    | <div><div></div></div> | 6 / 1                  | Ser_Thr_Tyr Phosphatase |
| Oxysterols receptor LXR-beta                      | P55055     | NR1H2     | CHEMBL4093    | <div><div></div></div> | 10 / 13                | Transcription Factor    |
| Oxysterols receptor LXR-alpha                     | Q13133     | NR1H3     | CHEMBL2808    | <div><div></div></div> | 10 / 13                | Transcription Factor    |
| Androgen receptor                                 | P10275     | AR        | CHEMBL1871    | <div><div></div></div> | 6 / 16                 | Transcription Factor    |
| UDP-glucuronosyltransferase 2B7                   | P16662     | UGT2B7    | CHEMBL4370    | <div><div></div></div> | 0 / 8                  | Enzyme                  |
| UDP-glucuronosyltransferase 2B11<br>(by homology) | O75310     | UGT2B11   |               | <div><div></div></div> | 0 / 8                  | Enzyme                  |
| UDP-glucuronosyltransferase 2B17<br>(by homology) | O75795     | UGT2B17   | CHEMBL4978    | <div><div></div></div> | 0 / 8                  | Enzyme                  |
| UDP-glucuronosyltransferase 2B4<br>(by homology)  | P06133     | UGT2B4    | CHEMBL6196    | <div><div></div></div> | 0 / 8                  | Enzyme                  |
| UDP-glucuronosyltransferase 2B10<br>(by homology) | P36537     | UGT2B10   | CHEMBL6160    | <div><div></div></div> | 0 / 8                  | Enzyme                  |
| UDP-glucuronosyltransferase 2B15<br>(by homology) | P54855     | UGT2B15   | CHEMBL6161    | <div><div></div></div> | 0 / 8                  | Enzyme                  |
| UDP-glucuronosyltransferase 2A3<br>(by homology)  | Q6UWM9     | UGT2A3    |               | <div><div></div></div> | 0 / 8                  | Enzyme                  |
| UDP-glucuronosyltransferase 2B28<br>(by homology) | Q9BY64     | UGT2B28   | CHEMBL6189    | <div><div></div></div> | 0 / 8                  | Enzyme                  |
| UDP-glucuronosyltransferase 2A1<br>(by homology)  | Q9Y4X1     | UGT2A1    | CHEMBL1743321 | <div><div></div></div> | 0 / 8                  | Enzyme                  |
| Sodium-dependent noradrenaline transporter        | P23975     | SLC6A2    | CHEMBL222     | <div><div></div></div> | 17 / 1                 | Transporter             |
