# Supplementary material
Source: MDPI journal article supplement (https://www.mdpi.com/2076-3417/11/3/1244)
Supplement: s1 [file s1]

# SwissTargetPrediction report:

**Reference:**

Gfeller D., Michielin O. & Zoete V.  
Shaping the interaction landscape of  
bioactive molecules, *Bioinformatics*  
(2013) 29:3073-3079.

**Query Molecule**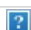**Frequency of Target Class**

| Target                                                                               | Uniprot ID | Gene code | ChEMBL ID     | Probability            | # sim. cmpds (3D / 2D) | Target Class       |
|--------------------------------------------------------------------------------------|------------|-----------|---------------|------------------------|------------------------|--------------------|
| Tyrosyl-DNA phosphodiesterase 1                                                      | Q9NUW8     | TDP1      | CHEMBL1075138 | <div><div></div></div> | 1 / 13                 | Enzyme             |
| Dual specificity tyrosine-phosphorylation-regulated kinase 1A ( <i>by homology</i> ) | Q13627     | DYRK1A    | CHEMBL2292    | <div><div></div></div> | 0 / 3                  | Ser_Thr_Tyr Kinase |
| Microtubule-associated protein tau                                                   | P10636     | MAPT      | CHEMBL1293224 | <div><div></div></div> | 1 / 6                  | Unclassified       |
| Carbonic anhydrase 1                                                                 | P00915     | CA1       | CHEMBL261     | <div><div></div></div> | 0 / 27                 | Enzyme             |
| Carbonic anhydrase 2                                                                 | P00918     | CA2       | CHEMBL205     | <div><div></div></div> | 0 / 27                 | Enzyme             |
| Carbonic anhydrase 3 ( <i>by homology</i> )                                          | P07451     | CA3       | CHEMBL2885    | <div><div></div></div> | 0 / 27                 | Enzyme             |
| Carbonic anhydrase 5A, mitochondrial ( <i>by homology</i> )                          | P35218     | CA5A      | CHEMBL4789    | <div><div></div></div> | 0 / 27                 | Enzyme             |
| Carbonic anhydrase 7 ( <i>by homology</i> )                                          | P43166     | CA7       | CHEMBL2326    | <div><div></div></div> | 0 / 27                 | Enzyme             |
| Carbonic anhydrase 13 ( <i>by homology</i> )                                         | Q8N1Q1     | CA13      | CHEMBL3912    | <div><div></div></div> | 0 / 27                 | Enzyme             |
| Carbonic anhydrase 5B, mitochondrial ( <i>by homology</i> )                          | Q9Y2D0     | CA5B      | CHEMBL3969    | <div><div></div></div> | 0 / 27                 | Enzyme             |
| Carbonic anhydrase 12                                                                | O43570     | CA12      | CHEMBL3242    | <div><div></div></div> | 0 / 10                 | Enzyme             |
| Gamma-secretase C-terminal fragment 59                                               | P05067     | APP       | CHEMBL2487    | <div><div></div></div> | 0 / 1                  | Membrane receptor  |
| Carbonic anhydrase 4                                                                 | P22748     | CA4       | CHEMBL3729    | <div><div></div></div> | 0 / 6                  | Enzyme             |
| Carbonic anhydrase 6                                                                 | P23280     | CA6       | CHEMBL3025    | <div><div></div></div> | 0 / 6                  | Enzyme             |
| Carbonic anhydrase 9                                                                 | Q16790     | CA9       | CHEMBL3594    | <div><div></div></div> | 0 / 9                  | Enzyme             |
